Abstract  
Paper Sessions

Neurological and Neuropsychiatric Disorders: Traumatic Brain Injury & Other

A - 12

**The Dimensionality of Symptoms Before and After Sport-Related Concussion**

*J Karr, G Iverson*

**Objective:** Multiple factor analyses have examined the dimensionality of physical, emotional, and cognitive symptoms both before and after a sport-related concussion. The current study compared model fit and measurement invariance of five candidate factor models, including a one-factor model, original four-factor model (cognitive-sensory, vestibular-somatic, sleep-arousal, and affective), alternative four-factor model (cognitive, physical, sleep-arousal, and affective), five-factor model (cognitive-sensory separated), and bifactor model. **Method:** Student athletes ( $N = 1,554$ ; 56.7% boys; age:  $M = 16.1 \pm 1.2$ ) completed the Post-Concussion Symptoms Scale (PCSS) at preseason baseline and after a suspected concussion. Confirmatory factor analyses were conducted at both time points, with pre-injury to post-injury measurement invariance models (configural, weak, strong, and strict) also examined. Model results were assessed via fit indices ( $CFI \geq .90/RMSEA \leq .08$ ) and change-in-fit indices ( $\Delta CFI \leq -.01$ ). **Results:** All models other than the one-factor model showed excellent fit before and after concussion ( $CFIs > .95/RMSEAs \leq .06$ ). Based on pre-injury to post-injury invariance analyses, full weak invariance was established for both four-factor and the bifactor models, and partial strict invariance was established for each of these models following modifications. **Conclusions:** Support for partial strict invariance indicates that meaningful comparisons can be made between factor means before and after concussion for the four-factor and bifactor models, evidencing the validity of a total symptom score and specific symptom subscales before and after concussion. The alternative four-factor model may offer an improved conceptual framework compared to the original four-factor model, which included a non-intuitive cognitive-sensory factor. These findings could support the development of normative scores for PCSS subscales for use in research and clinical practice.
